# Supplementary material for: Evaluation of impact of climate change and anthropogenic change on regional hydrology
Source: Copernicus journal article supplement (doi:10.5194/hess-2018-91), 2018-03-26
Supplement: Supplementary file 1 [file hess-2018-91-supplement.pdf]

1 These supplemental figures are for section 3.2 (Figures S1 to S3) and section 3.3 (Figures S4 to  
2 S6). Figures S1 to S3 represent the mean daily streamflow by month for Alafia river, Cypress  
3 creek, and Pithlachascotee river, respectively for each water use scenario. They showed similar  
4 results with Figure 2 in section 3.2. The boxplots represents the range of mean daily streamflow  
5 projections over eight GCMs and Hargreaves method for human water use scenarios.  
6 Retrospective GCMs for business as usual scenario accurately reproduced observed mean daily  
7 streamflow and mean daily streamflow simulated by historic NLDAS-2 for all three river gages.

8 Figures S4 to S6 show the mean daily groundwater level by month for CBR-SERW-s, NWH-  
9 RMP-13s, and STK-STARKEY-20s wells, respectively for each water use scenario. The  
10 NLDAS-2 and retrospective GCMs for business as usual scenario predicted higher groundwater  
11 level than observed groundwater level for the CBR-SERW-s and STK-STARKEY-20s wells  
12 throughout the year. For NWH-RMP-13s well, the NLDAS-2 and retrospective GCMs for  
13 business as usual scenario predicted lower than observed groundwater levels in wet season  
14 however, greater than observed groundwater levels in dry season.

15

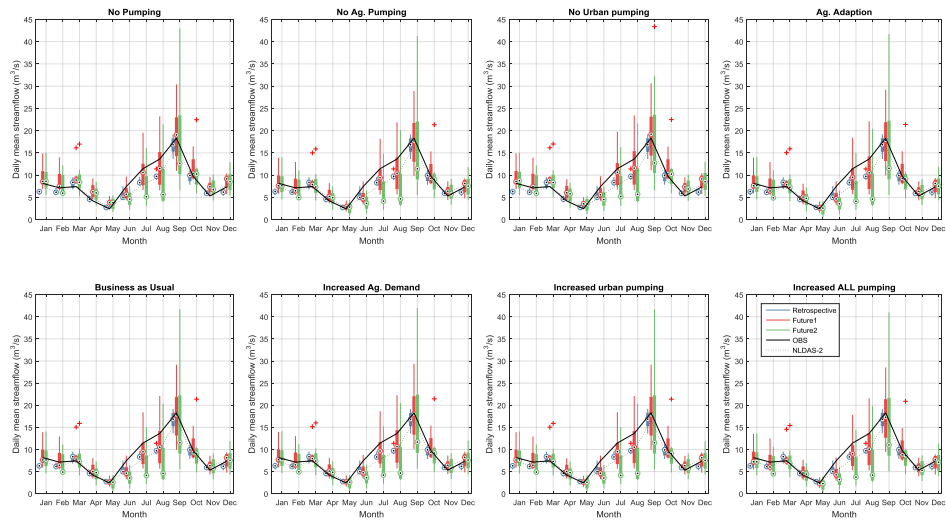

16

17 Figure S1. Mean daily streamflow by month for Alafia river for each water use scenario (white  
 18 circles in the boxplots represent median value).

19

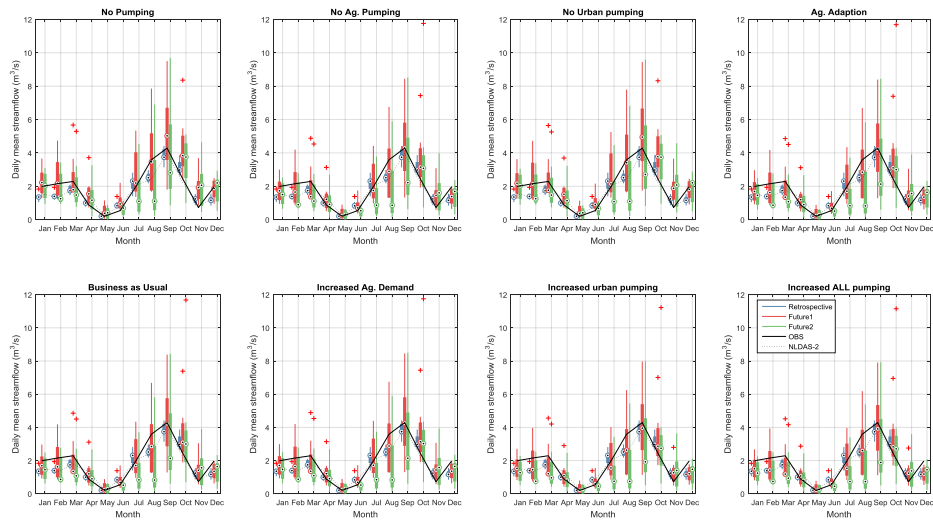

20

21 Figure S2. Mean daily streamflow by month for Cypress creek for each water use scenario (white  
 22 circles in the boxplots represent median value).

23

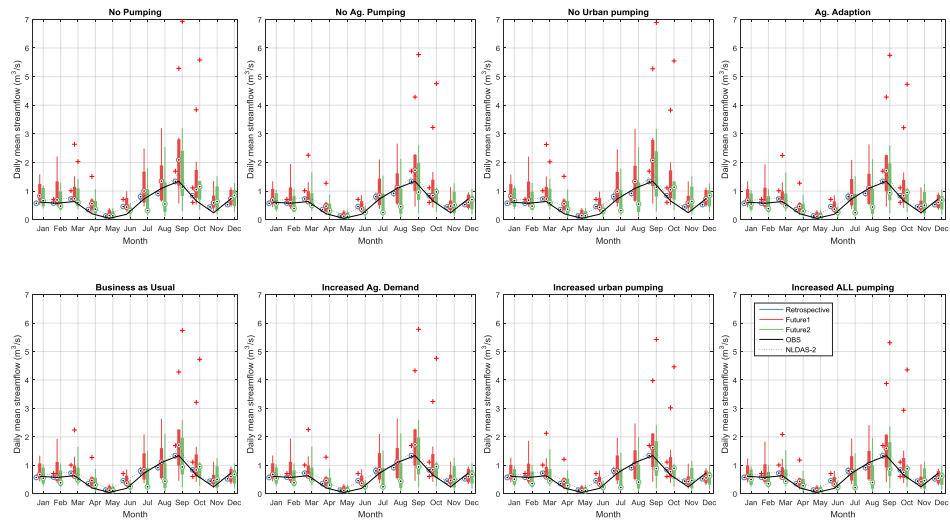

24

25 Figure S3. Mean daily streamflow by month for Pithlachascotee river for each water use scenario  
 26 (white circles in the boxplots represent median value).

27

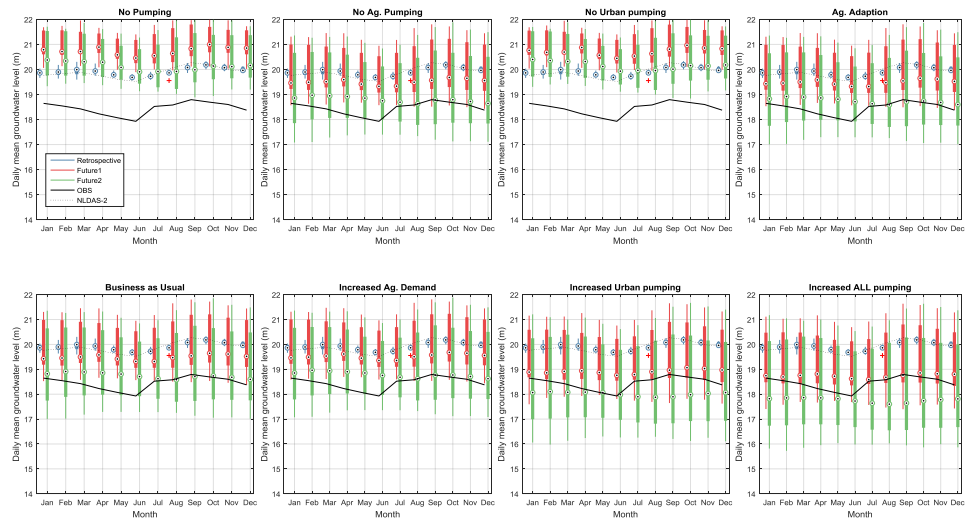

28

29 Figure S4. Mean daily groundwater level by month for CBR-SERW-s for each water use scenario  
 30 white circles in the boxplots represent median value).

31

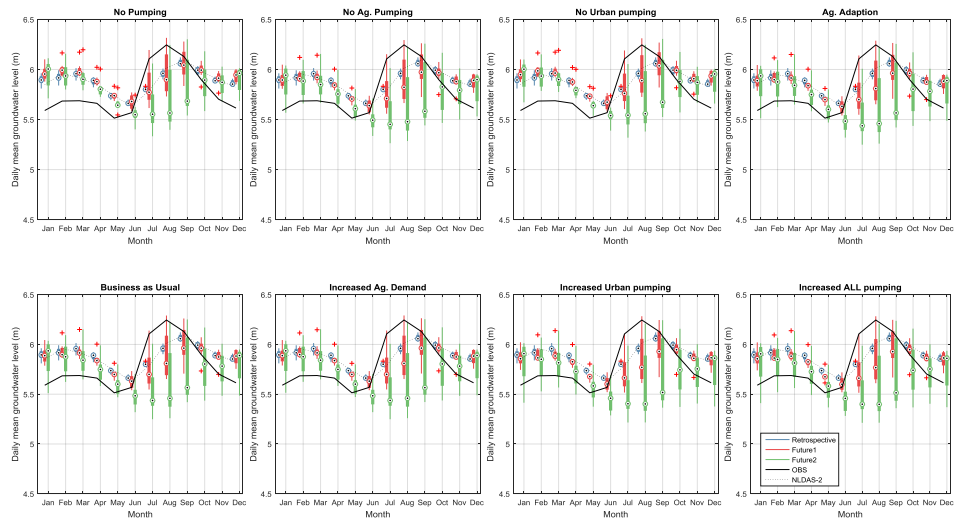

32

33 Figure S5. Mean daily groundwater level by month for NWH-RMP-13s for each water use  
 34 scenario (white circles in the boxplots represent median value).

35

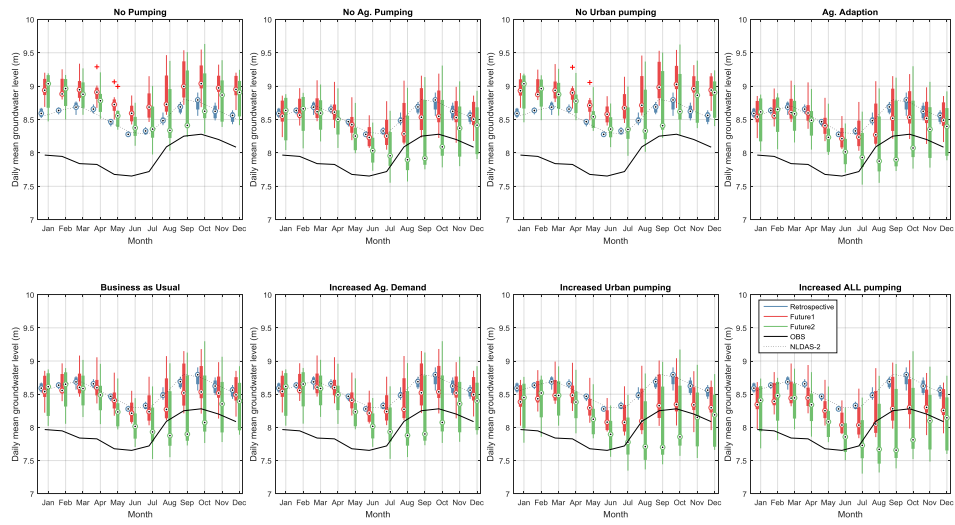

36

37 Figure S6. Mean daily groundwater level by month for STK-STARKEY-20s creek for each water  
 38 use scenario (white circles in the boxplots represent median value).

39
